# Supplementary material for: Preparation of Water-Soluble Polyion Complex (PIC) Micelles Covered with Amphoteric Random Copolymer Shells with Pendant Sulfonate and Quaternary Amino Groups
Source: Polymers (Basel). 2018 Feb 19;10(2):205. doi: 10.3390/polym10020205 (PMC6415021; doi:10.3390/polym10020205)
Supplement: Supplementary file 1 [file polymers-10-00205-s001.pdf]

# Preparation of Water-soluble Polyion Complex (PIC) Micelles Covered with Amphoteric Random Copolymer Shells with Pendant Sulfonate and Quaternary Amino Groups

Rina Nakahata and Shin-ichi Yusa\*

Department of Applied Chemistry, University of Hyogo, 2167 Shosha, Himeji, Hyogo 671-2280, Japan;  
[nkht9999@gmail.com](mailto:nkht9999@gmail.com) (R.N.); [yusa@eng.u-hyogo.ac.jp](mailto:yusa@eng.u-hyogo.ac.jp) (S.Y.)

\* Correspondence: [yusa@eng.u-hyogo.ac.jp](mailto:yusa@eng.u-hyogo.ac.jp); Tel.: +81-79-267-4954

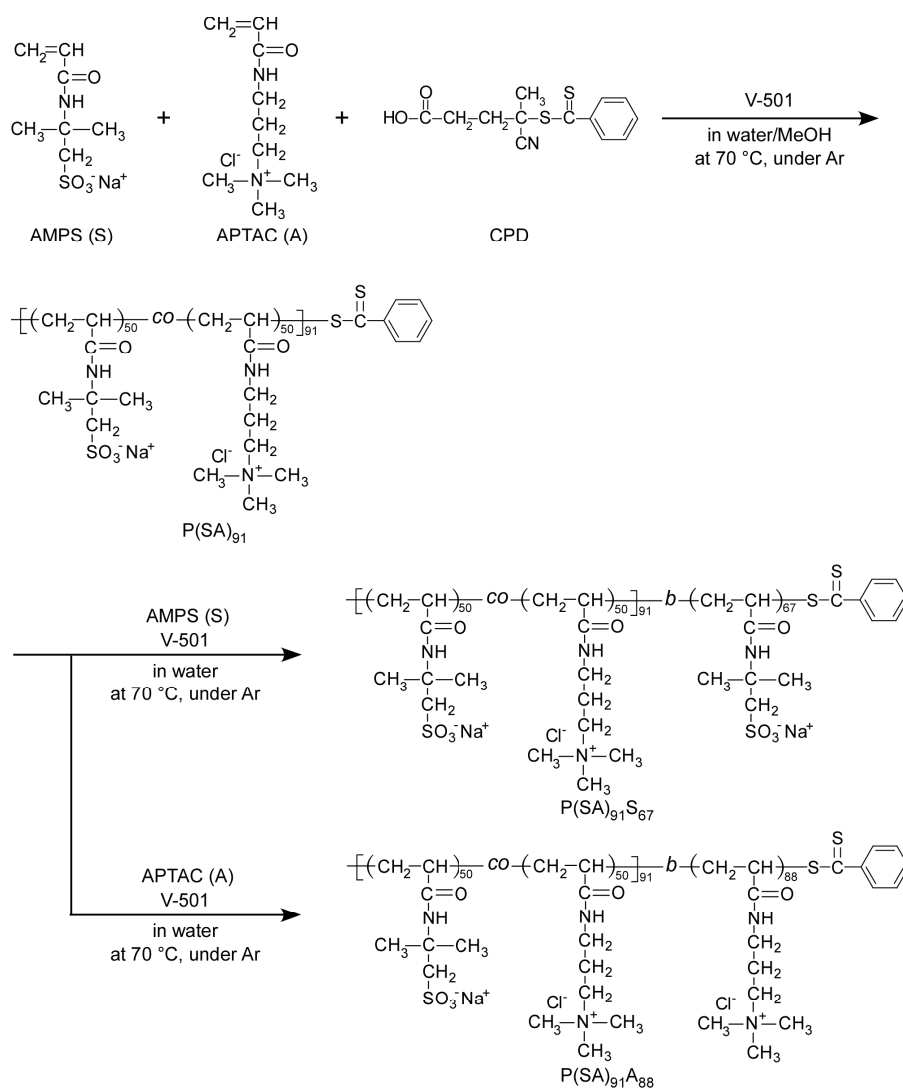

**Figure S1.** Synthesis routes of P(SA)<sub>91</sub>S<sub>67</sub> and P(SA)<sub>91</sub>A<sub>88</sub>.

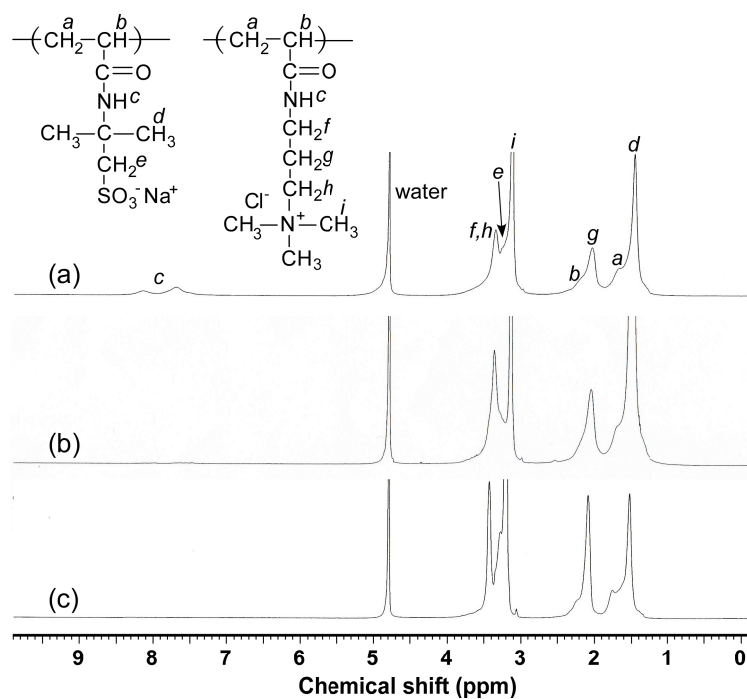

**Figure S2.**  $^1\text{H}$  NMR spectra for (a) P(SA)<sub>91</sub>, (b) P(SA)<sub>91</sub>S<sub>67</sub>, and (c) P(SA)<sub>91</sub>A<sub>88</sub> in  $\text{D}_2\text{O}$ .

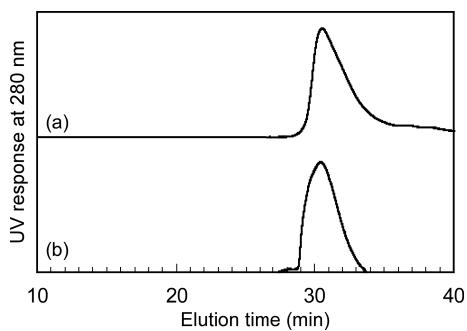

**Figure S3.** GPC elution curves for (a) P(SA)<sub>91</sub>S<sub>67</sub> and (b) P(SA)<sub>91</sub>A<sub>88</sub> using an acetic acid (0.5 M) solution containing sodium sulfate (0.3 M) as an eluent.

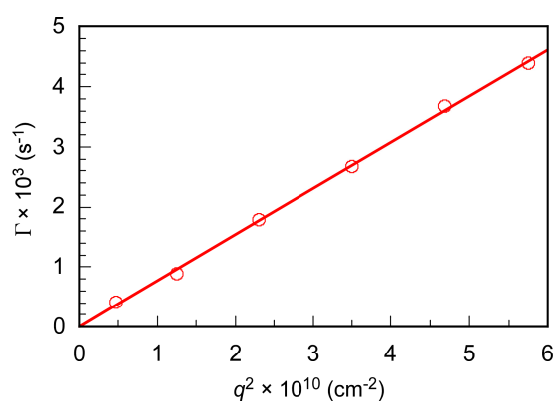

**Figure S4.** Relationship between the relaxation rate ( $\Gamma$ ) and the square of the magnitude of the scattering intensity vector ( $q^2$ ) for PIC micelles at  $C_p = 1$  g/L in 0.1 M aqueous NaCl at 25 °C.

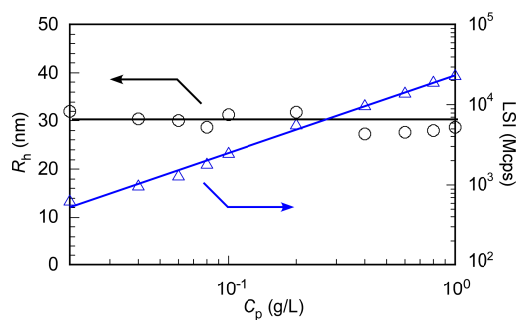

**Figure S5.** Hydrodynamic radius ( $R_h$ ,  $\circ$ ) and light scattering intensity (LSI,  $\Delta$ ) of PIC micelles as a function of polymer concentration ( $C_p$ ) in 0.1 M aqueous NaCl.

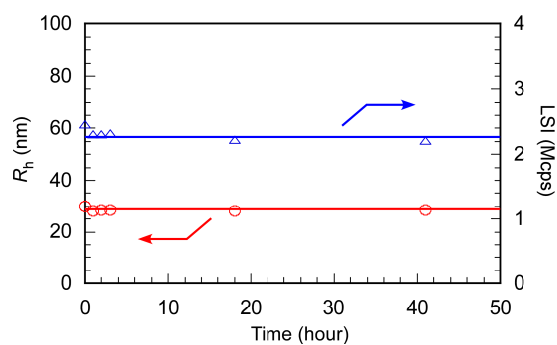

**Figure 6.** Relationship between  $R_h$  ( $\circ$ ) and light scattering intensity (LSI,  $\Delta$ ) as a function of time for PIC micelle with  $f^* = 0.5$  at  $C_p = 1.0$  g/L in 0.1 M NaCl aqueous solution.

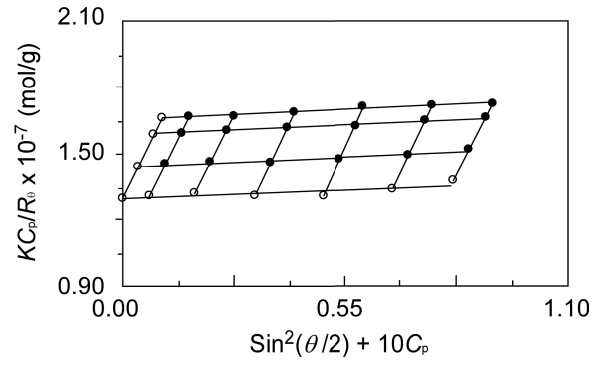

**Figure S7.** A typical Zimm plot for PIC micelles in 0.1 M aqueous NaCl at 25 °C.

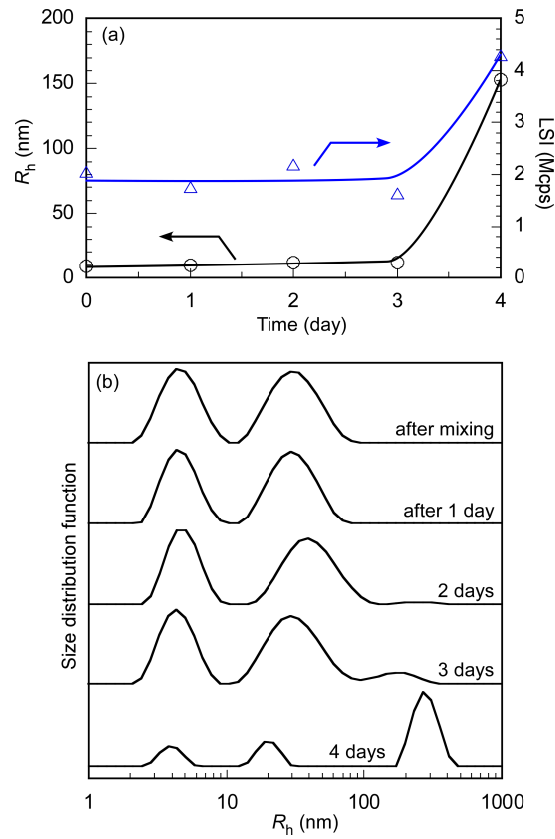

**Figure S8.** (a) Relationship between  $R_h$  ( $\circ$ ) and light scattering intensity (LSI,  $\Delta$ ) as a function of time, and (b)  $R_h$  distributions for a mixture of PIC micelles/BSA at  $C_p = 0.1$  g/L and  $[BSA] = 5.0$  g/L in PBS at 25 °C.

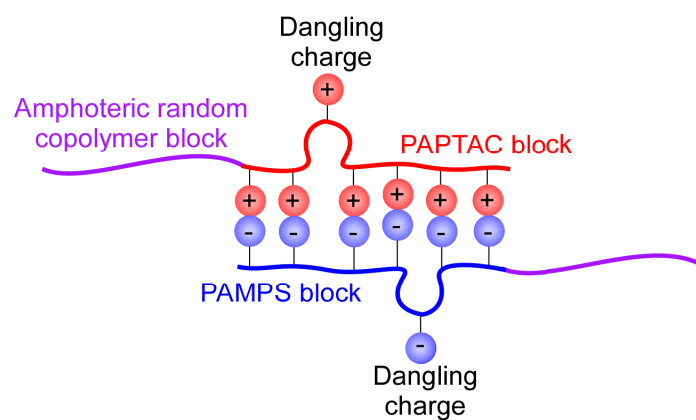

**Figure S9.** Conceptual illustration of dangling charge groups in the unit PIC of  $P(SA)_{91}S_{67}/P(SA)_{91}A_{88}$ .

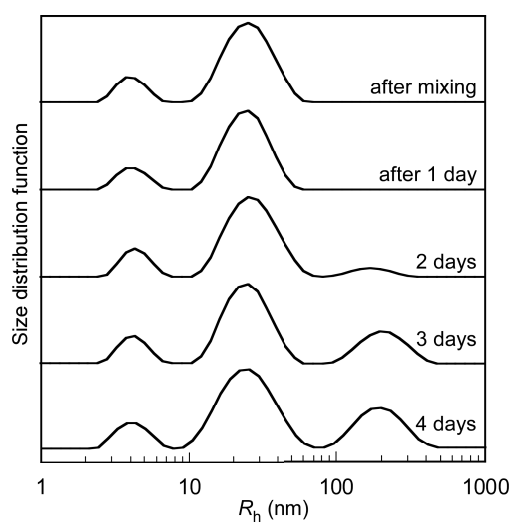

**Figure S10.**  $R_h$  distributions for mixture of PIC micelle/FBS at  $C_p = 0.1$  g/L and  $[FBS] = 40$  g/L in PBS at 25 °C.
